# Supplementary material for: Stroma-derived IL-6, G-CSF and Activin-A mediated dedifferentiation of lung carcinoma cells into cancer stem cells
Source: PubMed Central journal article supplement (PMC6070555; doi:10.1038/s41598-018-29947-w), 2018-08-01
Supplement: 41598_2018_29947_MOESM1_ESM.pdf [file 41598_2018_29947_MOESM1_ESM.pdf]

## Research Article

### Title: Stroma-derived IL-6, G-CSF and Activin-A mediated dedifferentiation of lung carcinoma cells into cancer stem cells

Carlos F.D. Rodrigues<sup>a,b,c,d</sup>, Eurico Serrano<sup>a,b</sup>, Maria I. Patrício<sup>e</sup>, Mariana M. Val<sup>b,f</sup>, Patrícia Albuquerque<sup>a,g</sup>, João Fonseca<sup>h</sup>, Célia M.F. Gomes<sup>b,i</sup>, Antero J. Abrunhosa<sup>j</sup>, Artur Paiva<sup>d</sup>, Lina Carvalho<sup>b,c,d</sup>, M. Filomena Botelho<sup>b,c</sup>, Luís Almeida<sup>a,g</sup>, Isabel M. Carreira<sup>a,b,c,f</sup> and Maria Carmen Alpoim<sup>a,b,k,\*</sup>

<sup>a</sup> Center for Neuroscience and Cell Biology (CNC), University of Coimbra, 3004-517 Coimbra, Portugal;

<sup>b</sup> Center of Investigation in Environment, Genetics and Oncobiology (CIMAGO), Faculty of Medicine, University of Coimbra, 3001-301 Coimbra, Portugal;

<sup>c</sup> Faculty of Medicine (FMUC), University of Coimbra, 3000-548 Coimbra, Portugal;

<sup>d</sup> Centro Hospitalar e Universitário de Coimbra (CHUC), 3000-075 Coimbra, Portugal;

<sup>e</sup> Nuffield Laboratory of Ophthalmology, NDCN & NIHR Oxford Biomedical Research Centre, University of Oxford, Oxford OX3 9DU, United Kingdom;

<sup>f</sup> Laboratory of Cytogenetics and Genomics, Faculty of Medicine, University of Coimbra, 3000-548 Coimbra, Portugal;

<sup>g</sup> Faculty of Pharmacy (FFUC), University of Coimbra, 3000-548 Coimbra, Portugal;

<sup>h</sup> Centre for Biotechnology, Brock University, St. Catharines, Ontario, Canada L2S 3A1;

<sup>i</sup> Pharmacology and Experimental Therapeutics - Institute of Biomedical Research in Light and Image (IBILI), Faculty of Medicine, University of Coimbra, 3000-354 Coimbra, Portugal;

<sup>j</sup> Institute for Nuclear Sciences Applied to Health (ICNAS), University of Coimbra, 3000-354 Coimbra, Portugal;

<sup>k</sup> Department of Life Sciences, Faculty of Science and Technology (FCTUC), University of Coimbra, 3000-456 Coimbra, Portugal;

#### **\*Corresponding Author:**

Maria Carmen Alpoim  
Departamento de Ciências da Vida  
Faculdade de Ciências e Tecnologia  
Universidade de Coimbra  
Calçada Martim de Freitas  
3000-456 Coimbra  
Portugal  
Phone: +351239240726  
Fax: +351239 240 701  
E-mail: [mcAlpoim@bioq.uc.pt](mailto:mcAlpoim@bioq.uc.pt)

## Supplementary Information

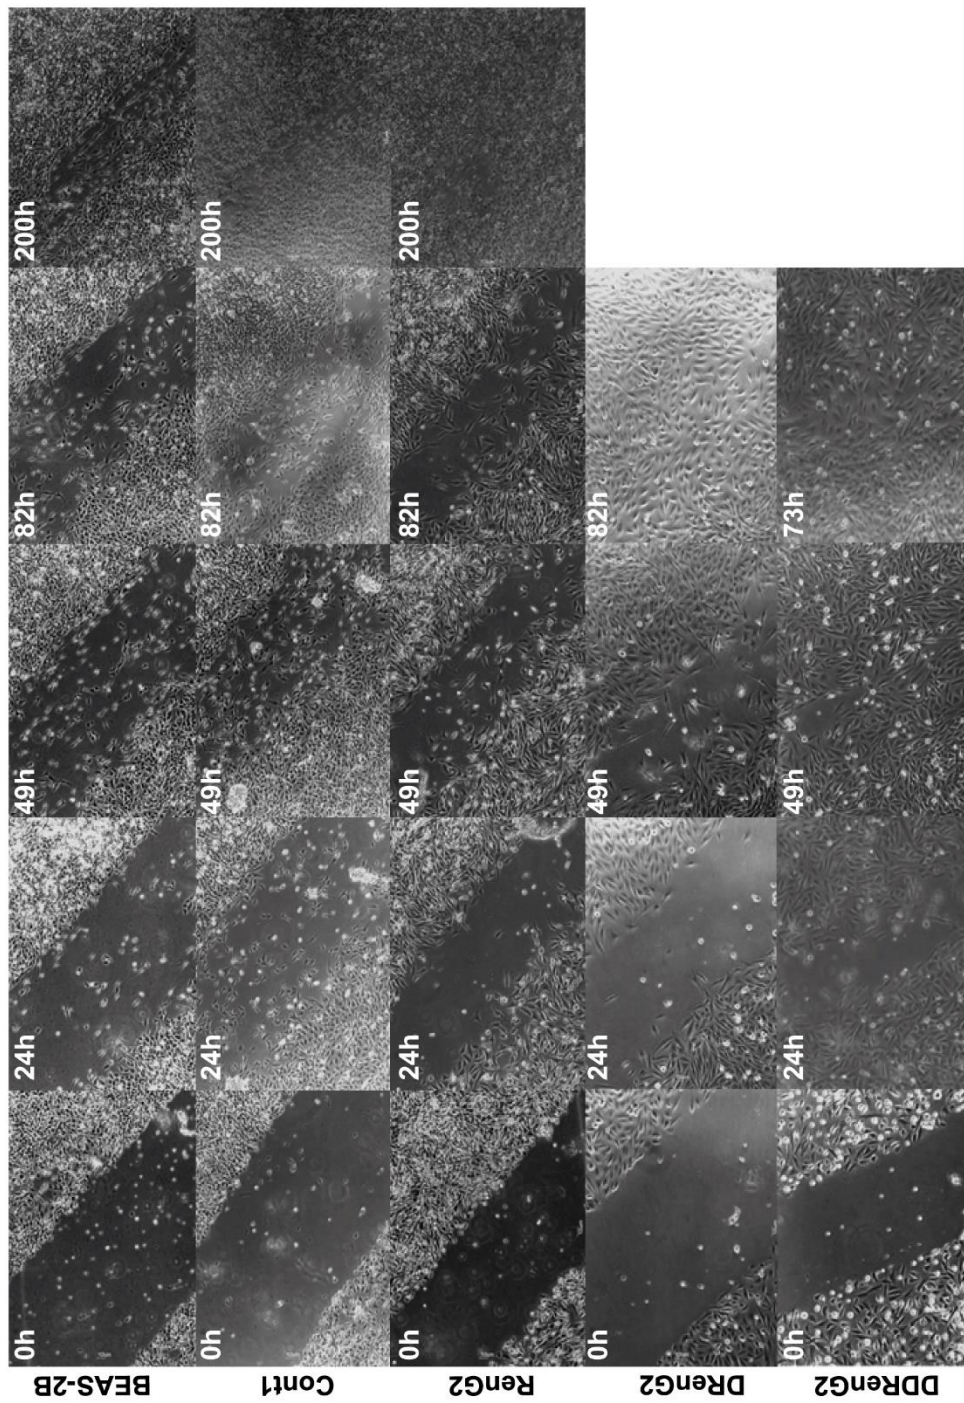

**Supplementary Figure S1 – Migration ability of the different cellular systems.** Both BEAS-2B and Cont-1 cell lines failed to close the scratch, even after 200 h. RenG2 cells grossly closed it, but DRenG2 and DDRenG2 did it faster and better in progressively less time. A magnification of 100x was used in all panels.

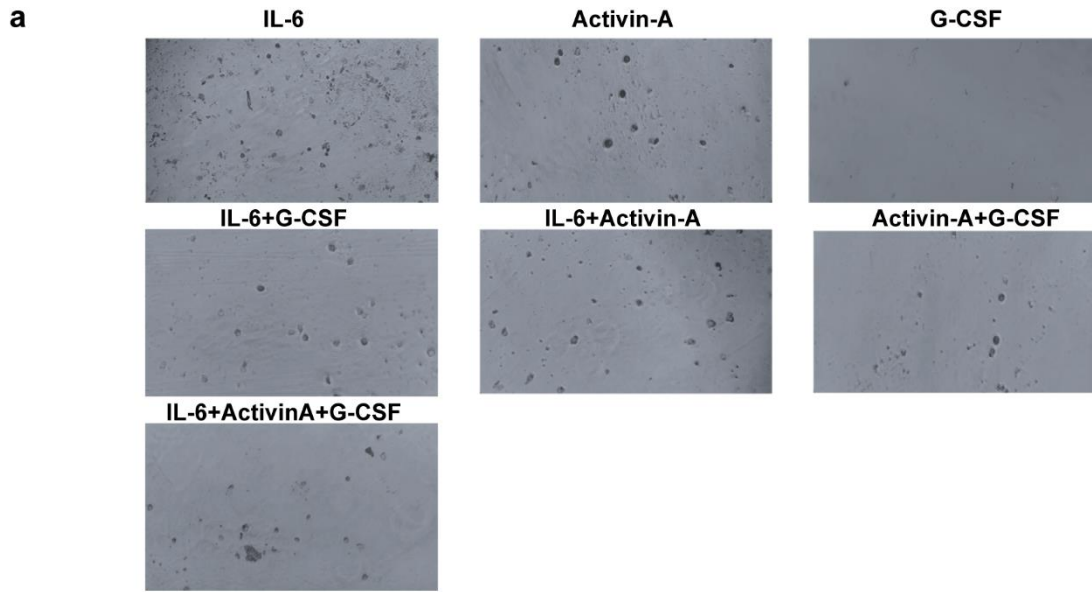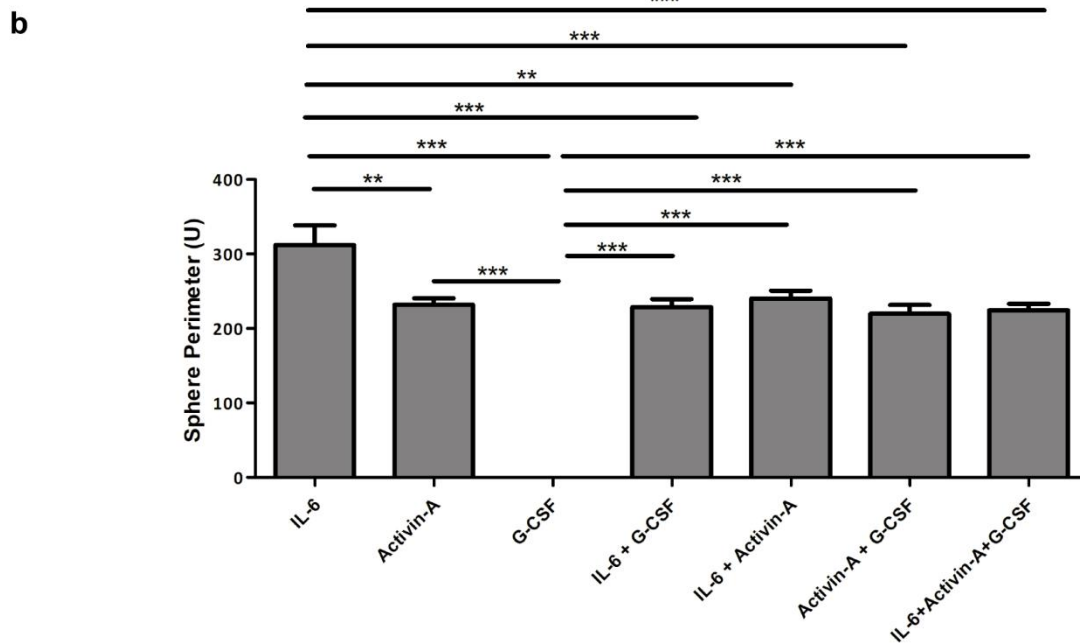

**Supplementary Figure S2 – Proof-of-concept experiment illustrating cytokines-mediated dedifferentiation.** (A) Sphere-forming assay performed in different conditions of cytokines' abrogation, showing that spheres were observed whenever either IL-6 or Activin-A was present. G-CSF was unable to induce sphere formation. (B) Perimeter analysis. Corroborating the previous results, bigger spheres were attained when only IL-6 was present. A magnification of 100x was used in all panels. 10 spheres were measured in each condition. Data represent means  $\pm$ SEM. Differences between the means were evaluated by one-way ANOVA followed by a Bonferroni post test.

**Supplementary Table S1. Statistical significance of drug-resistance assays in Figure 1F and 2F.** MTX, methotrexate; Cis, cisplatin; Gem, Gemcitabine. Differences between the means were evaluated by a repeated measures ANOVA followed by a Bonferroni post test in relation to control. n.s., no significant; \*,  $P \leq 0.05$ ; \*\*,  $P \leq 0.01$ ; \*\*\*,  $P \leq 0.001$ .

| Cell line  | MTX ( $\mu\text{M}$ ) |     |     | Cis ( $\mu\text{M}$ ) |     |     | Gem ( $\mu\text{M}$ ) |     |     |
|------------|-----------------------|-----|-----|-----------------------|-----|-----|-----------------------|-----|-----|
|            | 0.1                   | 10  | 50  | 0.1                   | 10  | 50  | 0.1                   | 10  | 50  |
| BEAS-2B    | **                    | *** | *** | ***                   | *** | *** | ***                   | *** | *** |
| Cont1      | ***                   | *** | *** | ***                   | *** | *** | ***                   | *** | *** |
| RenG2      | *                     | **  | *** | *                     | *   | **  | *                     | **  | **  |
| DRenG2     | ***                   | *** | *** | n.s                   | n.s | *   | n.s                   | n.s | n.s |
| DDRenG2    | **                    | *** | *** | n.s                   | n.s | *   | n.s                   | n.s | n.s |
| SC-DRenG2  | n.s                   | n.s | *   | –                     | –   | –   | –                     | –   | –   |
| SC-DDRenG2 | n.s                   | n.s | *   | –                     | –   | –   | –                     | –   | –   |
